# Supplementary material
Source: publisher figshare collection journal article supplement (https://sage.figshare.com/ndownloader/files/15051221)
Supplement: Supplementary file 1 [file 15051221]

## Appendices

**Table A1.** Association between Berry-Index and nutritional status

|                               |                     |  | height-for-age Z-scores |           | BMI-for-age Z-scores |           |
|-------------------------------|---------------------|--|-------------------------|-----------|----------------------|-----------|
|                               |                     |  | Coef.                   | SE        | Coef.                | SE        |
| dietary diversity score       |                     |  | 0.253                   | (0.098)*  | -0.045               | (0.114)   |
| sex                           | boys                |  | ref.                    |           | ref.                 |           |
|                               | girls               |  | 0.061                   | (0.026)*  | 0.009                | (0.032)   |
| age (in years)                |                     |  | -0.011                  | (0.007)   | -0.003               | (0.010)   |
| sibling size                  |                     |  | -0.115                  | (0.018)** | -0.061               | (0.018)** |
| mother's education (in years) |                     |  | 0.015                   | (0.004)** | 0.016                | (0.005)** |
| real PCE (in million Rupiah)  |                     |  | 0.164                   | (0.018)** | 0.168                | (0.022)** |
| residential area              | urban               |  | ref.                    |           | ref.                 |           |
|                               | rural               |  | -0.318                  | (0.031)** | -0.079               | (0.038)*  |
| Island                        | Java & Bali         |  | ref.                    |           | ref.                 |           |
|                               | outside Java & Bali |  | -0.098                  | (0.033)** | 0.107                | (0.039)** |
| Seasons                       | dry season          |  | ref.                    |           | ref.                 |           |
|                               | rainy season        |  | -0.010                  | (0.025)   | 0.014                | (0.032)   |
| IFLS wave                     | IFLS-3 (2000)       |  | ref.                    |           | ref.                 |           |
|                               | IFLS-4 (2007/2008)  |  | 0.115                   | (0.034)** | 0.156                | (0.040)** |
|                               | IFLS-5 (2014/2015)  |  | 0.350                   | (0.039)** | 0.322                | (0.046)** |
| Constant                      |                     |  | -1.469                  | (0.110)** | -0.836               | (0.134)** |
| R <sup>2</sup>                |                     |  | 0.139                   |           | 0.054                |           |
| R <sup>2</sup> -adj           |                     |  | 0.136                   |           | 0.051                |           |

\* p<0.05; \*\* p<0.01

N of children=6,368; N of mothers=3,833

Birth order dummies were included in the models but are not presented to reduce the table size. Cluster-robust standard error at mother level in parentheses. The WHO growth standards were used to calculate height-for-age Z-scores and BMI-for-age Z-scores.

9 **Table A2.** Ethnic group differences in dietary diversity (Model 1)

|                               |                    | Berry-Index |           | tubers |           | vegetables |           | fruits |           | animal-source |           | dairy products |           |
|-------------------------------|--------------------|-------------|-----------|--------|-----------|------------|-----------|--------|-----------|---------------|-----------|----------------|-----------|
|                               |                    | Coef.       | SE        | Coef.  | SE        | Coef.      | SE        | Coef.  | SE        | Coef.         | SE        | Coef.          | SE        |
| ethnic group                  | Javanese           | ref.        |           | ref.   |           | ref.       |           | ref.   |           | ref.          |           | ref.           |           |
|                               | Batak              | -0.017      | (0.009)   | -0.081 | (0.093)   | 0.436      | (0.141)** | -0.460 | (0.132)** | 1.204         | (0.137)** | 0.014          | (0.156)   |
|                               | Minangkabau        | -0.031      | (0.008)** | -0.241 | (0.067)** | -1.336     | (0.137)** | -0.037 | (0.119)   | -0.120        | (0.121)   | -0.075         | (0.144)   |
| sex                           | boys               | ref.        |           | ref.   |           | ref.       |           | ref.   |           | ref.          |           | ref.           |           |
|                               | girls              | 0.011       | (0.004)** | 0.094  | (0.034)** | 0.161      | (0.058)** | 0.037  | (0.054)   | -0.085        | (0.052)   | -0.058         | (0.063)   |
| real PCE (in million Rupiah)  |                    | 0.015       | (0.002)** | -0.047 | (0.018)*  | -0.003     | (0.031)   | 0.127  | (0.031)** | 0.289         | (0.030)** | 0.586          | (0.047)** |
| age (in years)                |                    | -0.002      | (0.001)*  | -0.009 | (0.010)   | 0.031      | (0.017)   | -0.035 | (0.015)*  | -0.069        | (0.015)** | -0.168         | (0.018)** |
| mother's education (in years) |                    | 0.003       | (0.001)** | -0.001 | (0.006)   | 0.023      | (0.009)** | 0.003  | (0.008)   | 0.023         | (0.008)** | 0.083          | (0.010)** |
| sibling size                  |                    | 0.003       | (0.002)   | 0.090  | (0.030)** | 0.063      | (0.036)   | 0.046  | (0.035)   | 0.024         | (0.036)   | -0.126         | (0.039)** |
| residential area              | urban              | ref.        |           | ref.   |           | ref.       |           | ref.   |           | ref.          |           | ref.           |           |
|                               | rural              | -0.007      | (0.004)   | 0.217  | (0.041)** | 0.186      | (0.069)** | 0.186  | (0.065)** | -0.208        | (0.064)** | -0.630         | (0.077)** |
|                               | Java-Bali          | ref.        |           | ref.   |           | ref.       |           | ref.   |           | ref.          |           | ref.           |           |
|                               | outside Java-Bali  | -0.002      | (0.006)   | -0.005 | (0.057)   | 0.474      | (0.085)** | -0.113 | (0.082)   | 0.344         | (0.086)** | -0.200         | (0.099)*  |
| seasonality                   | dry season         | ref.        |           | ref.   |           | ref.       |           | ref.   |           | ref.          |           | ref.           |           |
|                               | rainy season       | 0.006       | (0.004)   | 0.009  | (0.035)   | 0.009      | (0.059)   | 0.015  | (0.054)   | 0.058         | (0.053)   | 0.087          | (0.064)   |
| IFLS wave                     | IFLS-3 (2000)      | ref.        |           | ref.   |           | ref.       |           | ref.   |           | ref.          |           | ref.           |           |
|                               | IFLS-4 (2007/2008) | 0.008       | (0.004)   | 0.103  | (0.056)   | -0.786     | (0.077)** | -0.567 | (0.078)** | 0.111         | (0.074)   | 0.228          | (0.088)** |
|                               | IFLS-5 (2014/2015) | -0.097      | (0.006)** | -0.485 | (0.054)** | -2.536     | (0.088)** | -1.236 | (0.084)** | -0.233        | (0.083)** | -0.274         | (0.095)** |
| constant                      |                    | 0.621       | (0.012)** | 0.749  | (0.124)** | 4.623      | (0.209)** | 3.048  | (0.188)** | 4.356         | (0.187)** | 3.181          | (0.240)** |
| R <sup>2</sup>                |                    | 0.110       |           | 0.065  |           | 0.206      |           | 0.065  |           | 0.071         |           | 0.149          |           |
| R <sup>2</sup> -adj           |                    | 0.107       |           | 0.061  |           | 0.203      |           | 0.062  |           | 0.068         |           | 0.146          |           |

\* p<0.05; \*\* p<0.01

N of children = 6,478; N of mothers = 3,878

Birth order dummies were included in the models but are not presented to reduce the table size. Cluster-robust standard error at mother level in parentheses.

13 **Table A3.** Predictive margins of dietary diversity differed by ethnic group

|                        | Javanese |           | Batak  |           | Minangkabau |           |
|------------------------|----------|-----------|--------|-----------|-------------|-----------|
|                        | margin   | SE        | margin | SE        | margin      | SE        |
| within-ethnic-group:   |          |           |        |           |             |           |
| Berry-Index            | 0.614    | (0.002)** | 0.597  | (0.009)** | 0.583       | (0.008)** |
| tubers                 | 0.863    | (0.025)** | 0.782  | (0.085)** | 0.622       | (0.057)** |
| vegetables             | 4.437    | (0.037)** | 4.873  | (0.131)** | 3.100       | (0.128)** |
| fruits                 | 2.402    | (0.036)** | 1.942  | (0.120)** | 2.365       | (0.109)** |
| animal-source foods    | 4.227    | (0.037)** | 5.431  | (0.125)** | 4.108       | (0.109)** |
| dairy products         | 1.993    | (0.043)** | 2.007  | (0.144)** | 1.918       | (0.130)** |
| between-ethnic-groups: |          |           |        |           |             |           |
| Berry-Index            |          |           | -0.017 | (0.009)   | -0.031      | (0.008)** |
| tubers                 |          |           | -0.081 | (0.093)   | -0.241      | (0.067)** |
| vegetables             |          |           | 0.436  | (0.141)** | -1.336      | (0.137)** |
| fruits                 |          |           | -0.460 | (0.132)** | -0.037      | (0.119)   |
| animal-source foods    |          |           | 1.204  | (0.137)** | -0.120      | (0.121)   |
| dairy products         |          |           | 0.014  | (0.156)   | -0.075      | (0.144)   |

14 \* p<0.05; \*\* p<0.01

15 Berry-Index: 0–0.8. Food consumption freq.: 0–7 day(s). Predictive margins are from Model 1. Cluster-robust standard errors  
 16 at mother level in parentheses. For between-ethnic-groups differences: Javanese children (ref.).

17 **Table A4.** Ethnic group differences in dietary diversity by gender (Model 2)

|                               |                    | Berry-Index |           | tubers |           | vegetables |           | fruits |           | animal-source |           | dairy products |           |
|-------------------------------|--------------------|-------------|-----------|--------|-----------|------------|-----------|--------|-----------|---------------|-----------|----------------|-----------|
|                               |                    | Coef.       | SE        | Coef.  | SE        | Coef.      | SE        | Coef.  | SE        | Coef.         | SE        | Coef.          | SE        |
| ethnic group                  | Javanese           | ref.        |           | ref.   |           | ref.       |           | ref.   |           | ref.          |           | ref.           |           |
|                               | Batak              | -0.028      | (0.012)*  | -0.184 | (0.101)   | 0.343      | (0.163)*  | -0.480 | (0.151)** | 1.156         | (0.157)** | -0.054         | (0.185)   |
|                               | Minangkabau        | -0.041      | (0.011)** | -0.259 | (0.078)** | -1.593     | (0.163)** | 0.045  | (0.149)   | -0.143        | (0.145)   | 0.011          | (0.171)   |
| ethnic group × girls          | Javanese           | ref.        |           | ref.   |           | ref.       |           | ref.   |           | ref.          |           | ref.           |           |
|                               | Batak              | 0.025       | (0.013)*  | 0.231  | (0.134)   | 0.205      | (0.185)   | 0.047  | (0.199)   | 0.106         | (0.180)   | 0.154          | (0.221)   |
|                               | Minangkabau        | 0.023       | (0.012)   | 0.040  | (0.093)   | 0.583      | (0.205)** | -0.185 | (0.178)   | 0.054         | (0.168)   | -0.196         | (0.200)   |
| sex                           | boys               | ref.        |           | ref.   |           | ref.       |           | ref.   |           | ref.          |           | ref.           |           |
|                               | girls              | 0.007       | (0.004)   | 0.069  | (0.039)   | 0.079      | (0.064)   | 0.053  | (0.059)   | -0.100        | (0.058)   | -0.051         | (0.071)   |
| PCE (in million Rupiah)       |                    | 0.015       | (0.002)** | -0.047 | (0.018)*  | -0.003     | (0.032)   | 0.127  | (0.031)** | 0.289         | (0.030)** | 0.586          | (0.047)** |
| age (in years)                |                    | -0.002      | (0.001)*  | -0.009 | (0.010)   | 0.030      | (0.017)   | -0.034 | (0.015)*  | -0.069        | (0.015)** | -0.168         | (0.018)** |
| mother's education (in years) |                    | 0.003       | (0.001)** | -0.001 | (0.006)   | 0.022      | (0.009)** | 0.003  | (0.008)   | 0.023         | (0.008)** | 0.084          | (0.010)** |
| sibling size                  |                    | 0.003       | (0.002)   | 0.088  | (0.030)** | 0.062      | (0.036)   | 0.045  | (0.035)   | 0.023         | (0.036)   | -0.128         | (0.039)** |
| residential area              | urban              | ref.        |           | ref.   |           | ref.       |           | ref.   |           | ref.          |           | ref.           |           |
|                               | rural              | -0.007      | (0.004)   | 0.216  | (0.041)** | 0.184      | (0.069)** | 0.186  | (0.065)** | -0.208        | (0.064)** | -0.630         | (0.077)** |
|                               | Java-Bali          | ref.        |           | ref.   |           | ref.       |           | ref.   |           | ref.          |           | ref.           |           |
| seasonality                   | outside Java-Bali  | -0.002      | (0.006)   | -0.005 | (0.057)   | 0.476      | (0.085)** | -0.114 | (0.082)   | 0.344         | (0.086)** | -0.201         | (0.099)*  |
|                               | dry season         | ref.        |           | ref.   |           | ref.       |           | ref.   |           | ref.          |           | ref.           |           |
|                               | rainy season       | 0.006       | (0.004)   | 0.008  | (0.036)   | 0.006      | (0.059)   | 0.016  | (0.054)   | 0.058         | (0.053)   | 0.087          | (0.064)   |
| IFLS wave                     | IFLS-3 (2000)      | ref.        |           | ref.   |           | ref.       |           | ref.   |           | ref.          |           | ref.           |           |
|                               | IFLS-4 (2007/2008) | 0.008       | (0.004)   | 0.102  | (0.056)   | -0.787     | (0.077)** | -0.568 | (0.078)** | 0.110         | (0.074)   | 0.227          | (0.088)*  |
|                               | IFLS-5 (2014/2015) | -0.098      | (0.006)** | -0.487 | (0.054)** | -2.539     | (0.088)** | -1.236 | (0.084)** | -0.234        | (0.083)** | -0.275         | (0.095)** |
| constant                      |                    | 0.624       | (0.012)** | 0.763  | (0.125)** | 4.676      | (0.211)** | 3.037  | (0.189)** | 4.365         | (0.188)** | 3.174          | (0.242)** |
| R <sup>2</sup>                |                    | 0.111       |           | 0.065  |           | 0.207      |           | 0.065  |           | 0.071         |           | 0.149          |           |
| R <sup>2</sup> -adj           |                    | 0.108       |           | 0.062  |           | 0.204      |           | 0.062  |           | 0.068         |           | 0.146          |           |

18 \* p<0.05; \*\* p<0.01

19 N of children = 6,478; N of mothers = 3,878

20 Birth order dummies were included in the models but are not presented to reduce the table size. Cluster-robust standard error at mother level in parentheses.

21 **Table A5.** Predictive marginal contrasts of dietary diversity differed by ethnic group  $\times$  sex

|                        | Javanese |         | Batak  |           | Minangkabau |           |
|------------------------|----------|---------|--------|-----------|-------------|-----------|
|                        | margin   | SE      | margin | SE        | margin      | SE        |
| within-ethnic-group:   |          |         |        |           |             |           |
| Berry-Index            | 0.007    | (0.004) | 0.032  | (0.012)** | 0.029       | (0.012)*  |
| tubers                 | 0.069    | (0.039) | 0.300  | (0.128)*  | 0.109       | (0.085)   |
| vegetables             | 0.079    | (0.064) | 0.285  | (0.173)   | 0.663       | (0.195)** |
| fruits                 | 0.053    | (0.059) | 0.100  | (0.191)   | -0.132      | (0.168)   |
| animal-source foods    | -0.100   | (0.058) | 0.006  | (0.170)   | -0.047      | (0.157)   |
| dairy products         | -0.051   | (0.071) | 0.104  | (0.209)   | -0.247      | (0.187)   |
| between-ethnic-groups: |          |         |        |           |             |           |
| Berry-Index            |          |         | 0.025  | (0.013)*  | 0.023       | (0.012)   |
| tubers                 |          |         | 0.231  | (0.134)   | 0.040       | (0.093)   |
| vegetables             |          |         | 0.205  | (0.185)   | 0.583       | (0.205)** |
| fruits                 |          |         | 0.047  | (0.199)   | -0.185      | (0.178)   |
| animal-source foods    |          |         | 0.106  | (0.180)   | 0.054       | (0.168)   |
| dairy products         |          |         | 0.154  | (0.221)   | -0.196      | (0.200)   |

22 \*  $p < 0.05$ ; \*\*  $p < 0.01$

23 Berry-Index: 0–0.8. Food consumption freq.: 0–7 day(s). Predictive marginal contrast is from Model 2. Cluster-robust  
 24 standard errors at mother level in parentheses. For within-ethnic-group differences: boys (ref.); between-ethnic-groups  
 25 differences: Javanese children (ref.).

**Table A6.** Ethnic group differences in dietary diversity by PCE (Model 3)

|                               |                    | Berry-Index |           | tubers |           | vegetables |           | fruits |           | animal-source |           | dairy products |           |
|-------------------------------|--------------------|-------------|-----------|--------|-----------|------------|-----------|--------|-----------|---------------|-----------|----------------|-----------|
|                               |                    | Coef.       | SE        | Coef.  | SE        | Coef.      | SE        | Coef.  | SE        | Coef.         | SE        | Coef.          | SE        |
| ethnic group                  | Javanese           | ref.        |           | ref.   |           | ref.       |           | ref.   |           | ref.          |           | ref.           |           |
|                               | Batak              | -0.047      | (0.014)** | -0.025 | (0.153)   | 0.458      | (0.230)*  | -1.039 | (0.217)** | 1.394         | (0.232)** | -0.570         | (0.207)** |
|                               | Minangkabau        | -0.041      | (0.013)** | -0.282 | (0.087)** | -1.621     | (0.193)** | -0.294 | (0.173)   | -0.162        | (0.170)   | -0.061         | (0.201)   |
| ethnic group × PCE            | Javanese           | ref.        |           | ref.   |           | ref.       |           | ref.   |           | ref.          |           | ref.           |           |
|                               | Batak              | 0.032       | (0.011)** | -0.060 | (0.105)   | -0.029     | (0.188)   | 0.607  | (0.204)** | -0.202        | (0.170)   | 0.617          | (0.209)** |
|                               | Minangkabau        | 0.008       | (0.006)   | 0.033  | (0.038)   | 0.227      | (0.116)*  | 0.202  | (0.103)*  | 0.035         | (0.090)   | -0.014         | (0.129)   |
| sex                           | boys               | ref.        |           | ref.   |           | ref.       |           | ref.   |           | ref.          |           | ref.           |           |
|                               | girls              | 0.011       | (0.004)** | 0.094  | (0.034)** | 0.160      | (0.058)** | 0.038  | (0.054)   | -0.086        | (0.052)   | -0.057         | (0.063)   |
| PCE (in million Rupiah)       |                    | 0.013       | (0.002)** | -0.049 | (0.020)*  | -0.027     | (0.032)   | 0.091  | (0.031)** | 0.291         | (0.032)** | 0.572          | (0.050)** |
| age (in years)                |                    | -0.002      | (0.001)*  | -0.009 | (0.010)   | 0.031      | (0.017)   | -0.035 | (0.015)*  | -0.069        | (0.015)** | -0.169         | (0.018)** |
| mother's education (in years) |                    | 0.003       | (0.001)** | -0.001 | (0.006)   | 0.022      | (0.009)** | 0.002  | (0.008)   | 0.023         | (0.008)** | 0.083          | (0.010)** |
| sibling size                  |                    | 0.004       | (0.002)   | 0.089  | (0.030)** | 0.061      | (0.036)   | 0.056  | (0.035)   | 0.020         | (0.036)   | -0.114         | (0.039)** |
| residential area              | urban              | ref.        |           | ref.   |           | ref.       |           | ref.   |           | ref.          |           | ref.           |           |
|                               | rural              | -0.006      | (0.004)   | 0.215  | (0.042)** | 0.186      | (0.069)** | 0.201  | (0.064)** | -0.213        | (0.064)** | -0.615         | (0.077)** |
|                               | Java-Bali          | ref.        |           | ref.   |           | ref.       |           | ref.   |           | ref.          |           | ref.           |           |
| seasonality                   | outside Java-Bali  | -0.001      | (0.006)   | -0.005 | (0.057)   | 0.476      | (0.085)** | -0.110 | (0.082)   | 0.344         | (0.086)** | -0.198         | (0.099)*  |
|                               | dry season         | ref.        |           | ref.   |           | ref.       |           | ref.   |           | ref.          |           | ref.           |           |
|                               | rainy season       | 0.006       | (0.004)   | 0.009  | (0.036)   | 0.013      | (0.059)   | 0.024  | (0.054)   | 0.057         | (0.053)   | 0.092          | (0.064)   |
| IFLS wave                     | IFLS-3 (2000)      | ref.        |           | ref.   |           | ref.       |           | ref.   |           | ref.          |           | ref.           |           |
|                               | IFLS-4 (2007/2008) | 0.008       | (0.004)   | 0.104  | (0.056)   | -0.785     | (0.077)** | -0.570 | (0.078)** | 0.112         | (0.074)   | 0.224          | (0.088)*  |
|                               | IFLS-5 (2014/2015) | -0.097      | (0.006)** | -0.485 | (0.054)** | -2.532     | (0.088)** | -1.230 | (0.083)** | -0.233        | (0.083)** | -0.272         | (0.095)** |
| constant                      |                    | 0.622       | (0.012)** | 0.755  | (0.125)** | 4.655      | (0.210)** | 3.063  | (0.187)** | 4.365         | (0.187)** | 3.167          | (0.240)** |
| R <sup>2</sup>                |                    | 0.112       |           | 0.065  |           | 0.207      |           | 0.068  |           | 0.072         |           | 0.151          |           |
| R <sup>2</sup> -adj           |                    | 0.109       |           | 0.061  |           | 0.204      |           | 0.065  |           | 0.068         |           | 0.148          |           |

27 \* p&lt;0.05; \*\* p&lt;0.01

28 N of children = 6,478; N of mothers = 3,878

29 Birth order dummies were included in the models but are not presented to reduce the table size. Cluster-robust standard error at mother level in parentheses.

**Table A7.** Predictive marginal effects of dietary diversity differed by ethnic group  $\times$  PCE

|                        | Javanese |           | Batak  |           | Minangkabau |           |
|------------------------|----------|-----------|--------|-----------|-------------|-----------|
|                        | margin   | SE        | margin | SE        | margin      | SE        |
| within-ethnic-group:   |          |           |        |           |             |           |
| Berry-Index            | 0.013    | (0.002)** | 0.045  | (0.011)** | 0.021       | (0.006)** |
| tubers                 | -0.049   | (0.020)*  | -0.109 | (0.104)   | -0.016      | (0.034)   |
| vegetables             | -0.027   | (0.032)   | -0.055 | (0.186)   | 0.201       | (0.112)   |
| fruits                 | 0.091    | (0.031)** | 0.698  | (0.203)** | 0.293       | (0.100)** |
| animal-source foods    | 0.291    | (0.032)** | 0.089  | (0.168)   | 0.325       | (0.085)** |
| dairy products         | 0.572    | (0.050)** | 1.189  | (0.206)** | 0.558       | (0.121)** |
| between-ethnic-groups: |          |           |        |           |             |           |
| Berry-Index            |          |           | 0.032  | (0.011)** | 0.008       | (0.006)   |
| tubers                 |          |           | -0.060 | (0.105)   | 0.033       | (0.038)   |
| vegetables             |          |           | -0.029 | (0.188)   | 0.227       | (0.116)*  |
| fruits                 |          |           | 0.607  | (0.204)** | 0.202       | (0.103)*  |
| animal-source foods    |          |           | -0.202 | (0.170)   | 0.035       | (0.090)   |
| dairy products         |          |           | 0.617  | (0.209)** | -0.014      | (0.129)   |

\*  $p < 0.05$ ; \*\*  $p < 0.01$

Berry-Index: 0–0.8. Food consumption freq.: 0–7 day(s). Predictive marginal effects of PCE are from Model 3. Cluster-robust standard errors at mother level in parentheses. For between-ethnic-groups differences: Javanese children (ref.).
